# Supplementary material for: An Amino Acid Signature Associated with Obesity Predicts 2-Year Risk of Hypertriglyceridemia in School-Age Children
Source: PubMed Central journal article supplement (PMC5514079; doi:10.1038/s41598-017-05765-4), 2017-07-17
Supplement: 41598_2017_5765_MOESM1_ESM.pdf [file 41598_2017_5765_MOESM1_ESM.pdf]

ONLINE SUPPLEMENTAL MATERIAL

**An amino acid signature associated with obesity predicts 2-year risk of  
hypertriglyceridemia in school-age children**

Sofia Moran-Ramos<sup>1,2</sup>, Elvira Ocampo-Medina<sup>2</sup>, Ruth Gutierrez-Aguilar<sup>3,4</sup>, Luis Macías-Kauffer<sup>2</sup>, Hugo Villamil-Ramírez<sup>2</sup>, Blanca E. López-Contreras<sup>2</sup>, Paola León-Mimila<sup>2</sup>, Joel Vega-Badillo<sup>2</sup>, Roxana Gutierrez-Vidal<sup>2</sup>, Ricardo Villarruel-Vazquez<sup>2</sup>, Erandi Serrano-Carbajal<sup>2</sup>, Blanca E Del-Río-Navarro<sup>3</sup>, Adriana Huertas-Vázquez<sup>5</sup>, Teresa Villarreal-Molina<sup>6</sup>, Isabel Ibarra-Gonzalez<sup>7</sup>, Carlos A. Aguilar-Salinas<sup>9</sup>, Marcela Vela-Amieva<sup>8</sup>, Samuel Canizales-Quinteros<sup>2\*</sup>

<sup>1</sup>Consejo Nacional de Ciencia y Tecnología (CONACYT), Mexico City, México.

<sup>2</sup>Unidad de Genómica de Poblaciones Aplicada a la Salud, Facultad de Química, UNAM/Instituto Nacional de Medicina Genómica (INMEGEN), Mexico City, México.

<sup>3</sup>Hospital Infantil México Federico Gómez, Mexico City, México.

<sup>4</sup>Facultad de Medicina, UNAM, Mexico City, México.

<sup>5</sup>Department of Medicine, David Geffen School of Medicine, UCLA, USA.

<sup>6</sup>Laboratorio de Enfermedades Cardiovasculares, INMEGEN, Mexico City, México.

<sup>7</sup>Instituto de Investigaciones Biomédicas, UNAM - Instituto Nacional de Pediatría, Mexico City, México.

<sup>8</sup>Laboratorio de Errores Innatos del Metabolismo y Tamiz, Instituto Nacional de Pediatría, Mexico City, México.

<sup>9</sup>Departamento de Endocrinología y Metabolismo, Instituto Nacional de Ciencias Médicas y Nutrición Salvador Zubirán, Mexico City, México.

**Supplemental Table 1. Abbreviations and internal standard used for measured analytes by FIA-MS/MS**

| Analyte   | Name                                         | Internal Standard                 |
|-----------|----------------------------------------------|-----------------------------------|
| Ala       | Alanine                                      | $^2\text{H}_4\text{-Ala}$         |
| Arg       | Arginine                                     | $^2\text{H}_4, ^{13}\text{C-Arg}$ |
| Cit       | Citrulline                                   | $^2\text{H}_2\text{-Cit}$         |
| Gly       | Glycine                                      | $^2\text{N}_2, ^{13}\text{C-Gly}$ |
| Leu/Ileu  | Leucine/Isoleucine                           | $^2\text{H}_3\text{-Leu}$         |
| Met       | Methionine                                   | $^2\text{H}_3\text{-Met}$         |
| Orn       | Ornithine                                    | $^2\text{H}_6\text{-Orn}$         |
| Phe       | Phenylalanine                                | $^{13}\text{C}_6\text{-Phe}$      |
| Pro       | Proline                                      | $^{13}\text{C}_5\text{-Pro}$      |
| Tyr       | Tyrosine                                     | $^{13}\text{C}_5\text{-Tyr}$      |
| Val       | Valine                                       | $^2\text{H}_8\text{-Val}$         |
| C0        | Free carnitine                               | $^2\text{H}_9\text{-C0}$          |
| C2        | Acetyl carnitine                             | $^2\text{H}_3\text{-C2}$          |
| C3        | Propionyl carnitine                          | $^2\text{H}_3\text{-C3}$          |
| C3DC/C4OH | Malonyl/3-hydroxy-buteryl carnitine          | $^2\text{H}_3\text{-C4}$          |
| C4        | Butyryl carnitine                            | $^2\text{H}_3\text{-C4}$          |
| C4DC/C5OH | Methylmalonyl/3-hydroxy-isovaleryl carnitine | $^2\text{H}_3\text{-C5}$          |
| C5        | Isovaleryl carnitine                         | $^2\text{H}_9\text{-C5}$          |
| C5:1      | Tiglyl carnitine                             | $^2\text{H}_9\text{-C5}$          |
| C5DC/C6OH | Glutaryl/3-Hydroxy-hexanoyl carnitine        | $^2\text{H}_6\text{-C5DC}$        |
| C6        | Hexanoyl carnitine                           | $^2\text{H}_3\text{-C6}$          |
| C6DC      | Adipyl carnitine                             | $^2\text{H}_6\text{-C5DC}$        |
| C8        | Octanoyl carnitine                           | $^2\text{H}_3\text{-C8}$          |
| C8:1      | Octenoyl carnitine                           | $^2\text{H}_3\text{-C8}$          |
| C10       | Decanoyl carnitine                           | $^2\text{H}_3\text{-C10}$         |
| C10:1     | Decenoyl carnitine                           | $^2\text{H}_3\text{-C10}$         |
| C10:2     | Decadienoyl carnitine                        | $^2\text{H}_3\text{-C10}$         |
| C12       | Dodecanoyl carnitine                         | $^2\text{H}_3\text{-C12}$         |
| C12:1     | Dodecenoyl carnitine                         | $^2\text{H}_3\text{-C12}$         |
| C14       | Tetradecanoyl (Myristoyl) carnitine          | $^2\text{H}_3\text{-C14}$         |
| C14:1     | Tetradecenoyl carnitine                      | $^2\text{H}_3\text{-C14}$         |
| C14:2     | Tetradecadienoyl carnitine                   | $^2\text{H}_3\text{-C14}$         |
| C14OH     | 3-Hydroxy-tetradecanoyl carnitine            | $^2\text{H}_3\text{-C14}$         |
| C16       | Hexadecanoyl (Palmitoyl) carnitine           | $^2\text{H}_3\text{-C16}$         |
| C16:1     | Hexadecenoyl carnitine                       | $^2\text{H}_3\text{-C16}$         |
| C16OH     | 3-Hydroxy-hexadecanoyl carnitine             | $^2\text{H}_3\text{-C16}$         |

**Supplemental Table 2. Characteristics of normal-weight and obese children from the case-control study.**

|                                     | Normal-weight |       |       | Obese      |       |       | P value                      |
|-------------------------------------|---------------|-------|-------|------------|-------|-------|------------------------------|
|                                     | 311/295       |       |       | 305/209    |       |       |                              |
|                                     | Percentile    |       |       | Percentile |       |       |                              |
|                                     | Median        | 25    | 75    | Median     | 25    | 75    |                              |
| <b>Clinical</b>                     |               |       |       |            |       |       |                              |
| Age (years)                         | 9.9           | 8.3   | 11.3  | 10.1       | 8.6   | 11.5  | <b>0.137</b>                 |
| Body weight (kg)                    | 30            | 25    | 37    | 51         | 41    | 60    | <b>4.0x10<sup>-125</sup></b> |
| Height (cm)                         | 135           | 125   | 146   | 143        | 133   | 151   | <b>1.4x10<sup>-15</sup></b>  |
| BMI (kg/m <sup>2</sup> )            | 16.4          | 15.6  | 17.4  | 24.6       | 22.9  | 26.7  | <b>6.0x10<sup>-183</sup></b> |
| BMI percentile                      | 47.6          | 30.0  | 59.6  | 97.4       | 96.2  | 98.5  | <b>2.6x10<sup>-183</sup></b> |
| BMI z score                         | -0.06         | -0.52 | 0.24  | 1.94       | 1.77  | 2.17  | <b>2.7x10<sup>-183</sup></b> |
| Fat mass (% of BW)                  | 25.3          | 21.9  | 29.35 | 45.25      | 41.78 | 48.8  | <b>1.5x10<sup>-170</sup></b> |
| Lean mass (% of BW)                 | 74.7          | 70.7  | 78.1  | 54.8       | 51.2  | 58.2  | <b>1.5x10<sup>-170</sup></b> |
| Systolic blood pressure percentile  | 32.5          | 14.5  | 55.2  | 58.0       | 34.6  | 81.5  | <b>2.0x10<sup>-32</sup></b>  |
| Diastolic blood pressure percentile | 63.7          | 42.7  | 81.3  | 67.7       | 46.0  | 85.7  | <b>0.006</b>                 |
| <b>Biochemical</b>                  |               |       |       |            |       |       |                              |
| Glucose (mg/dL)                     | 89            | 85    | 95    | 91         | 86.75 | 96    | <b>0.001</b>                 |
| Insulin (μ U/mL)                    | 4.4           | 3.0   | 6.3   | 10.6       | 6.8   | 15.5  | <b>7.5x10<sup>-81</sup></b>  |
| CRP (mg/dL)                         | 0.027         | 0.01  | 0.076 | 0.202      | 0.092 | 0.389 | <b>6.5x10<sup>-69</sup></b>  |
| HOMA-IR                             | 0.97          | 0.66  | 1.45  | 2.34       | 1.52  | 3.47  | <b>1.4x10<sup>-78</sup></b>  |
| Creatinine (mg/dL)                  | 0.46          | 0.39  | 0.54  | 0.49       | 0.43  | 0.57  | <b>1.1x10<sup>-5</sup></b>   |
| Uric acid (mg/dL)                   | 4.5           | 4     | 5.2   | 5.5        | 4.7   | 6.3   | <b>7.4x10<sup>-42</sup></b>  |
| <b>Lipids</b>                       |               |       |       |            |       |       |                              |
| Triacylglycerol (mg/dL)             | 74            | 54    | 103   | 129        | 94    | 175   | <b>4.9x10<sup>-66</sup></b>  |
| Total cholesterol (mg/dL)           | 166           | 147   | 182   | 177        | 155   | 197   | <b>1.4x10<sup>-9</sup></b>   |
| HDL-cholesterol (mg/dL)             | 51            | 45    | 59    | 41         | 35    | 47    | <b>2.9x10<sup>-54</sup></b>  |
| LDL-cholesterol (mg/dL)             | 97            | 82    | 111   | 106        | 91    | 121   | <b>1.2x10<sup>-9</sup></b>   |
| Apo-B                               | 71            | 61    | 82    | 82         | 71    | 95    | <b>2.0x10<sup>-20</sup></b>  |
| <b>Liver enzymes</b>                |               |       |       |            |       |       |                              |
| AST (U/L)                           | 29            | 25    | 33    | 30         | 25    | 36    | <b>0.007</b>                 |
| ALT (U/L)                           | 18            | 15    | 21    | 26         | 20    | 38    | <b>5.1x10<sup>-61</sup></b>  |
| GGT (UL)                            | 13            | 11    | 16    | 19         | 15    | 22    | <b>2.7x10<sup>-61</sup></b>  |

Significant P-values are shown in bold

**Supplemental Table 3. Association of principal components with biochemical parameters in normal-weight and obese children.**

| Clinical        |                 |       |                       |                        | Normal-weight |       |                       |                       |         | Obese |                       |                      |          |   |
|-----------------|-----------------|-------|-----------------------|------------------------|---------------|-------|-----------------------|-----------------------|---------|-------|-----------------------|----------------------|----------|---|
| 3MI percentile  | All individuals |       |                       |                        | β             | t     | P value               | Adjusted              | P       | β     | t                     | P value              | Adjusted | P |
|                 | β               | t     | P value               | Adjusted               |               |       |                       |                       |         |       |                       |                      |          |   |
| PC1             | 0.87            | 3.84  | 0.0001                | 0.0010                 | -0.12         | -0.66 | 0.51                  | 0.68                  | 0.02    | 1.07  | 0.29                  | 0.48                 |          |   |
| PC2             | 5.08            | 14.64 | 1.6x10 <sup>-44</sup> | 1.12x10 <sup>-42</sup> | 0.86          | 2.51  | 0.01                  | 0.048                 | 0.04    | 1.46  | 0.15                  | 0.30                 |          |   |
| PC3             | 0.87            | 1.83  | 0.07                  | 0.17                   | 0.49          | 1.15  | 0.25                  | 0.44                  | 0.04    | 1.44  | 0.15                  | 0.31                 |          |   |
| PC4             | 0.11            | 0.20  | 0.83                  | 0.90                   | 0.28          | 0.62  | 0.54                  | 0.69                  | 0.00    | -0.06 | 0.96                  | 0.98                 |          |   |
| PC5             | -3.37           | -5.79 | 9.4x10 <sup>-9</sup>  | 2.2x10 <sup>-7</sup>   | -0.51         | -1.20 | 0.23                  | 0.42                  | 0.05    | 0.99  | 0.32                  | 0.51                 |          |   |
| PC6             | -1.54           | -2.08 | 0.04                  | 0.11                   | -0.50         | -0.79 | 0.43                  | 0.62                  | -0.04   | -0.90 | 0.37                  | 0.56                 |          |   |
| Body fat %      |                 |       |                       |                        | Normal-weight |       |                       |                       |         | Obese |                       |                      |          |   |
| 3MI percentile  | All individuals |       |                       |                        | β             | t     | P value               | Adjusted              | P       | β     | t                     | P value              | Adjusted | P |
|                 | β               | t     | P value               | Adjusted               |               |       |                       |                       |         |       |                       |                      |          |   |
| PC1             | 0.48            | 5.35  | 1.1x10 <sup>-7</sup>  | 2.2x10 <sup>-6</sup>   | 0.14          | 2.17  | 0.03                  | 0.10                  | 0.11    | 1.72  | 0.09                  | 0.21                 |          |   |
| PC2             | 1.87            | 13.32 | 1.3x10 <sup>-37</sup> | 2.7x10 <sup>-35</sup>  | 0.25          | 1.98  | 0.05                  | 0.14                  | 0.01    | 1.10  | 0.92                  | 0.97                 |          |   |
| PC3             | 0.29            | 1.52  | 0.13                  | 0.28                   | -0.06         | -0.37 | 0.71                  | 0.83                  | 0.05    | 0.39  | 0.70                  | 0.82                 |          |   |
| PC4             | 0.17            | 0.79  | 0.42                  | 0.61                   | 0.51          | 3.12  | 0.002                 | 0.01                  | -0.14   | -0.97 | 0.33                  | 0.53                 |          |   |
| PC5             | -1.48           | -6.39 | 2.5x10 <sup>-10</sup> | 7.6x10 <sup>-9</sup>   | -0.33         | -2.21 | 0.03                  | 0.09                  | -0.18   | -0.88 | 0.38                  | 0.57                 |          |   |
| PC6             | -0.39           | -1.30 | 0.19                  | 0.37                   | 0.42          | 1.81  | 0.07                  | 0.18                  | -0.18   | -0.89 | 0.37                  | 0.57                 |          |   |
| Systolic blood  |                 |       |                       |                        | Normal-weight |       |                       |                       |         | Obese |                       |                      |          |   |
| 3MI percentile  | All individuals |       |                       |                        | β             | t     | P value               | Adjusted              | P       | β     | t                     | P value              | Adjusted | P |
|                 | β               | t     | P value               | Adjusted               |               |       |                       |                       |         |       |                       |                      |          |   |
| PC1             | -0.02           | -1.20 | 0.23                  | 0.42                   | -0.08         | -2.97 | 0.003                 | 0.02                  | 0.04    | 1.46  | 0.15                  | 0.30                 |          |   |
| PC2             | 0.08            | 2.57  | 0.01                  | 0.04                   | 0.05          | 1.02  | 0.31                  | 0.50                  | 0.10    | 2.21  | 0.03                  | 0.09                 |          |   |
| PC3             | 0.20            | 5.22  | 2.2x10 <sup>-7</sup>  | 4.1x10 <sup>-6</sup>   | 0.28          | 4.46  | 9.9x10 <sup>-6</sup>  | 0.0001                | 0.13    | 2.69  | 0.01                  | 0.03                 |          |   |
| PC4             | -0.12           | -2.89 | 0.004                 | 0.02                   | -0.22         | -3.64 | 0.0003                | 0.002                 | -0.02   | -0.41 | 0.68                  | 0.81                 |          |   |
| PC5             | -0.01           | -0.24 | 0.81                  | 0.89                   | 0.03          | 0.36  | 0.72                  | 0.83                  | -0.07   | -0.85 | 0.39                  | 0.59                 |          |   |
| PC6             | -0.10           | -1.81 | 0.07                  | 0.18                   | -0.23         | -2.72 | 0.007                 | 0.03                  | 0.05    | 0.65  | 0.51                  | 0.68                 |          |   |
| Diastolic blood |                 |       |                       |                        | Normal-weight |       |                       |                       |         | Obese |                       |                      |          |   |
| 3MI percentile  | All individuals |       |                       |                        | β             | t     | P value               | Adjusted              | P       | β     | t                     | P value              | Adjusted | P |
|                 | β               | t     | P value               | Adjusted               |               |       |                       |                       |         |       |                       |                      |          |   |
| PC1             | -1.76           | -0.08 | 0.94                  | 0.97                   | -63.92        | -2.13 | 0.03                  | 0.10                  | 77.71   | 2.28  | 0.02                  | 0.08                 |          |   |
| PC2             | 78.70           | 1.98  | 0.047                 | 0.14                   | 87.07         | 1.61  | 0.11                  | 0.24                  | 38.25   | 0.64  | 0.52                  | 0.68                 |          |   |
| PC3             | 115.50          | 2.44  | 0.01                  | 0.06                   | 152.03        | 2.06  | 0.04                  | 0.12                  | 72.85   | 1.17  | 0.24                  | 0.43                 |          |   |
| PC4             | 36.66           | 0.72  | 0.47                  | 0.64                   | 26.29         | 0.37  | 0.71                  | 0.83                  | 61.75   | 0.86  | 0.39                  | 0.59                 |          |   |
| PC5             | -38.21          | -0.57 | 0.57                  | 0.72                   | -88.68        | -1.04 | 0.30                  | 0.49                  | 90.13   | 0.78  | 0.44                  | 0.62                 |          |   |
| PC6             | 66.49           | 0.97  | 0.33                  | 0.53                   | 8.40          | 0.09  | 0.93                  | 0.97                  | 169.89  | 1.75  | 0.08                  | 0.20                 |          |   |
| Biochemical     |                 |       |                       |                        | Normal-weight |       |                       |                       |         | Obese |                       |                      |          |   |
| 3MI percentile  | All individuals |       |                       |                        | β             | t     | P value               | Adjusted              | P       | β     | t                     | P value              | Adjusted | P |
|                 | β               | t     | P value               | Adjusted               |               |       |                       |                       |         |       |                       |                      |          |   |
| PC1             | -0.0003         | -0.38 | 0.70                  | 0.83                   | -0.0011       | -1.00 | 0.32                  | 0.51                  | 0.0005  | 0.51  | 0.61                  | 0.76                 |          |   |
| PC2             | 0.0063          | 4.91  | 1.0x10 <sup>-6</sup>  | 1.9x10 <sup>-5</sup>   | 0.0070        | 3.69  | 0.0002                | 0.002                 | 0.0064  | 3.71  | 0.0002                | 0.002                |          |   |
| PC3             | -0.0006         | -0.41 | 0.68                  | 0.81                   | -0.0014       | -0.53 | 0.60                  | 0.74                  | 0.0001  | 0.07  | 0.94                  | 0.97                 |          |   |
| PC4             | 0.0020          | 1.24  | 0.22                  | 0.41                   | 0.0017        | 0.68  | 0.50                  | 0.67                  | 0.0023  | 1.07  | 0.29                  | 0.48                 |          |   |
| PC5             | -0.0042         | -1.92 | 0.06                  | 0.15                   | -0.0058       | -1.93 | 0.05                  | 0.15                  | -0.0040 | -1.17 | 0.24                  | 0.43                 |          |   |
| PC6             | -0.0012         | -0.54 | 0.59                  | 0.74                   | 0.0010        | 0.28  | 0.78                  | 0.87                  | -0.0034 | -1.19 | 0.24                  | 0.42                 |          |   |
| 3MI percentile  | All individuals |       |                       |                        | β             | t     | P value               | Adjusted              | P       | β     | t                     | P value              | Adjusted | P |
|                 | β               | t     | P value               | Adjusted               |               |       |                       |                       |         |       |                       |                      |          |   |
| PC1             | -0.013          | -2.55 | 0.01                  | 0.04                   | -0.022        | -3.00 | 0.002                 | 0.01                  | -0.011  | -1.60 | 0.11                  | 0.25                 |          |   |
| PC2             | 0.088           | 9.77  | 1.4x10 <sup>-21</sup> | 7.9x10 <sup>-20</sup>  | 0.097         | 7.31  | 1.2x10 <sup>-12</sup> | 4.7x10 <sup>-11</sup> | 0.076   | 6.47  | 2.4x10 <sup>-10</sup> | 7.6x10 <sup>-9</sup> |          |   |
| PC3             | 0.003           | 0.24  | 0.81                  | 0.89                   | -0.001        | -0.04 | 0.97                  | 0.98                  | -0.006  | -0.46 | 0.65                  | 0.79                 |          |   |
| PC4             | 0.037           | 3.20  | 0.001                 | 0.008                  | 0.072         | 4.11  | 4.6x10 <sup>-5</sup>  | 0.0004                | 0.014   | 0.95  | 0.34                  | 0.53                 |          |   |
| PC5             | -0.013          | -0.76 | 0.45                  | 0.62                   | -0.006        | -0.24 | 0.81                  | 0.89                  | -0.030  | -1.25 | 0.21                  | 0.40                 |          |   |
| PC6             | -0.028          | -1.76 | 0.08                  | 0.19                   | -0.036        | -1.51 | 0.13                  | 0.28                  | -0.015  | -0.77 | 0.44                  | 0.62                 |          |   |
| 3MI percentile  | All individuals |       |                       |                        | β             | t     | P value               | Adjusted              | P       | β     | t                     | P value              | Adjusted | P |
|                 | β               | t     | P value               | Adjusted               |               |       |                       |                       |         |       |                       |                      |          |   |
| PC1             | 0.013           | 1.09  | 0.27                  | 0.47                   | -0.012        | -0.62 | 0.54                  | 0.69                  | 0.017   | 1.20  | 0.23                  | 0.42                 |          |   |
| PC2             | 0.032           | 1.54  | 0.12                  | 0.27                   | 0.031         | 0.88  | 0.38                  | 0.57                  | 0.010   | 0.40  | 0.69                  | 0.82                 |          |   |
| PC3             | 0.008           | 0.35  | 0.73                  | 0.84                   | -0.014        | -0.32 | 0.75                  | 0.86                  | 0.009   | 0.35  | 0.73                  | 0.84                 |          |   |
| PC4             | -0.070          | -2.67 | 0.01                  | 0.034                  | -0.079        | -1.69 | 0.09                  | 0.22                  | -0.048  | -1.63 | 0.10                  | 0.24                 |          |   |
| PC5             | 0.072           | 1.74  | 0.08                  | 0.20                   | 0.087         | 1.36  | 0.17                  | 0.34                  | 0.059   | 1.21  | 0.23                  | 0.42                 |          |   |
| PC6             | -0.063          | -1.80 | 0.07                  | 0.18                   | -0.119        | -1.98 | 0.05                  | 0.14                  | -0.032  | -0.81 | 0.42                  | 0.61                 |          |   |
| 3MI percentile  | All individuals |       |                       |                        | β             | t     | P value               | Adjusted              | P       | β     | t                     | P value              | Adjusted | P |
|                 | β               | t     | P value               | Adjusted               |               |       |                       |                       |         |       |                       |                      |          |   |
| PC1             | -0.014          | -2.53 | 0.01                  | 0.045                  | -0.023        | -2.99 | 0.002                 | 0.015                 | -0.012  | -1.61 | 0.11                  | 0.24                 |          |   |
| PC2             | 0.094           | 10.02 | 1.5x10 <sup>-22</sup> | 1.5x10 <sup>-20</sup>  | 0.103         | 7.39  | 5.7x10 <sup>-13</sup> | 3.0x10 <sup>-11</sup> | 0.081   | 6.74  | 1.6x10 <sup>-11</sup> | 1.7x10 <sup>-9</sup> |          |   |
| PC3             | 0.001           | 0.11  | 0.91                  | 0.97                   | -0.004        | -0.23 | 0.82                  | 0.89                  | -0.006  | -0.46 | 0.65                  | 0.79                 |          |   |
| PC4             | 0.040           | 3.31  | 0.0009                | 0.006                  | 0.076         | 4.09  | 5.1x10 <sup>-5</sup>  | 0.0005                | 0.017   | 1.09  | 0.28                  | 0.47                 |          |   |
| PC5             | -0.018          | -0.95 | 0.34                  | 0.53                   | -0.011        | -0.42 | 0.68                  | 0.81                  | -0.033  | -1.34 | 0.18                  | 0.35                 |          |   |
| PC6             | -0.027          | -1.65 | 0.10                  | 0.23                   | -0.032        | -1.27 | 0.20                  | 0.39                  | -0.017  | -0.83 | 0.41                  | 0.60                 |          |   |
| 3MI percentile  | All individuals |       |                       |                        | β             | t     | P value               | Adjusted              | P       | β     | t                     | P value              | Adjusted | P |
|                 | β               | t     | P value               | Adjusted               |               |       |                       |                       |         |       |                       |                      |          |   |
| PC1             | -0.0019         | -3.34 | 8.6x10 <sup>-4</sup>  | 0.005                  | -0.0018       | -2.36 | 0.02                  | 0.07                  | -0.0017 | -1.98 | 0.049                 | 0.14                 |          |   |
| PC2             | 0.0003          | 0.26  | 0.79                  | 0.88                   | -0.0011       | -0.77 | 0.44                  | 0.62                  | 0.0011  | 0.77  | 0.44                  | 0.62                 |          |   |
| PC3             | 0.0056          | 4.69  | 3.1x10 <sup>-6</sup>  | 4.6x10 <sup>-5</sup>   | 0.0055        | 2.89  | 0.004                 | 0.02                  | 0.0052  | 3.43  | 0.0006                | 0.005                |          |   |
| PC4             | -0.0037         | -2.92 | 0.003                 | 0.018                  | -0.0057       | -3.14 | 0.002                 | 0.01                  | -0.0018 | -1.04 | 0.30                  | 0.49                 |          |   |
| PC5             | -0.0013         | -0.76 | 0.45                  | 0.62                   | -0.0037       | -1.69 | 0.09                  | 0.22                  | 0.0033  | 1.16  | 0.25                  | 0.43                 |          |   |
| PC6             | -0.0005         | -0.27 | 0.79                  | 0.88                   | -0.0024       | -0.96 | 0.34                  | 0.53                  | 0.0027  | 1.11  | 0.27                  | 0.46                 |          |   |
| 3MI percentile  | All individuals |       |                       |                        | β             | t     | P value               | Adjusted              | P       | β     | t                     | P value              | Adjusted | P |
|                 | β               | t     | P value               | Adjusted               |               |       |                       |                       |         |       |                       |                      |          |   |
| PC1             | 0.0030          | 4.79  | 1.9x10 <sup>-6</sup>  | 3.1x10 <sup>-5</sup>   | 0.0041        | 4.82  | 1.9x10 <sup>-6</sup>  | 3.1x10 <sup>-5</sup>  | 0.0013  | 1.43  | 0.15                  | 0.31                 |          |   |
| PC2             | -0.0035         | -3.16 | 0.002                 | 0.009                  | -0.0056       | -3.69 | 0.0002                | 0.002                 | -0.0021 | -1.33 | 0.19                  | 0.36                 |          |   |
| PC3             | 0.0048          | 3.58  | 0.0004                | 0.003                  | 0.0065        | 3.12  | 0.002                 | 0.01                  | 0.0027  | 1.63  | 0.10                  | 0.24                 |          |   |
| PC4             | -0.0066         | -4.68 | 3.2x10 <sup>-6</sup>  | 4.6x10 <sup>-5</sup>   | -0.0084       | -4.20 | 3.1x10 <sup>-5</sup>  | 0.0003                | -0.0053 | -2.76 | 0.006                 | 0.028                |          |   |
| PC5             | 0.0023          | 1.21  | 0.23                  | 0.42                   | -0.0001       | -0.04 | 0.97                  | 0.98                  | 0.0052  | 1.67  | 0.10                  | 0.22                 |          |   |
| PC6             | 0.0066          | 3.43  | 0.0006                | 0.004                  | 0.0086        | 3.14  | 0.002                 | 0.01                  | 0.0061  | 2.36  | 0.019                 | 0.07                 |          |   |

| Lipids            |                 |       |                             |          |                             | Normal-weight |       |                             |          |                             |         | Obese |                            |          |                            |         |       |                             |          |                            |
|-------------------|-----------------|-------|-----------------------------|----------|-----------------------------|---------------|-------|-----------------------------|----------|-----------------------------|---------|-------|----------------------------|----------|----------------------------|---------|-------|-----------------------------|----------|----------------------------|
| Triacylglycerol   | All individuals |       |                             |          |                             | β             | t     | P value                     | Adjusted | P                           | β       | t     | P value                    | Adjusted | P                          | β       | t     | P value                     | Adjusted | P                          |
|                   | β               | t     | P value                     | Adjusted | P                           |               |       |                             |          |                             |         |       |                            |          |                            |         |       |                             |          |                            |
| PC1               | -0.008          | -2.05 | <b>0.04</b>                 |          | 0.12                        | -0.025        | -4.69 | <b>3.5x10<sup>-6</sup></b>  |          | <b>4.8x10<sup>-5</sup></b>  | 0.007   | 1.21  | 0.23                       |          | 0.42                       | 0.062   | 6.33  | <b>5.5x10<sup>-10</sup></b> |          | <b>1.6x10<sup>-8</sup></b> |
| PC2               | 0.067           | 10.15 | <b>3.4x10<sup>-23</sup></b> |          | <b>4.5x10<sup>-21</sup></b> | 0.071         | 7.75  | <b>1.1x10<sup>-14</sup></b> |          | <b>2.0x10<sup>-12</sup></b> | 0.006   | 0.60  | 0.55                       |          | 0.70                       | -0.013  | -0.96 | 0.34                        |          | 0.53                       |
| PC3               | 0.001           | 0.15  | 0.88                        |          | 0.95                        | 0.072         | 5.90  | <b>6.1x10<sup>-9</sup></b>  |          | <b>1.5x10<sup>-7</sup></b>  | -0.006  | -0.47 | 0.64                       |          | 0.78                       | -0.009  | -0.61 | 0.54                        |          | 0.70                       |
| PC4               | 0.030           | 3.38  | <b>0.0008</b>               |          | <b>0.005</b>                | -0.045        | -2.28 | 0.02                        |          | 0.02                        | -0.045  | -2.28 | 0.02                       |          | 0.08                       | -0.031  | -1.86 | 0.06                        |          | 0.17                       |
| PC5               | -0.022          | -1.91 | 0.06                        |          | 0.15                        | -0.045        | -2.61 | <b>0.009</b>                |          | <b>0.04</b>                 |         |       |                            |          |                            |         |       |                             |          |                            |
| PC6               | -0.038          | -3.17 | <b>0.001</b>                |          | <b>0.009</b>                |               |       |                             |          |                             |         |       |                            |          |                            |         |       |                             |          |                            |
| Total cholesterol |                 |       |                             |          |                             | Normal-weight |       |                             |          |                             |         | Obese |                            |          |                            |         |       |                             |          |                            |
| PC1               | All individuals |       |                             |          |                             | β             | t     | P value                     | Adjusted | P                           | β       | t     | P value                    | Adjusted | P                          | β       | t     | P value                     | Adjusted | P                          |
|                   | β               | t     | P value                     | Adjusted | P                           |               |       |                             |          |                             |         |       |                            |          |                            |         |       |                             |          |                            |
| PC1               | 0.0013          | 0.85  | 0.40                        |          | 0.59                        | 0.0002        | 0.12  | 0.91                        |          | 0.96                        | 0.0024  | 1.02  | 0.31                       |          | 0.50                       | 0.0066  | 1.80  | 0.07                        |          | 0.18                       |
| PC2               | 0.0073          | 2.76  | <b>0.006</b>                |          | <b>0.028</b>                | 0.0141        | 2.84  | <b>0.005</b>                |          | <b>0.02</b>                 | 0.0025  | 0.59  | 0.55                       |          | 0.71                       | 0.0010  | 0.21  | 0.83                        |          | 0.90                       |
| PC3               | 0.0069          | 2.15  | <b>0.03</b>                 |          | 0.10                        | -0.0021       | -0.37 | 0.71                        |          | 0.83                        | -0.0054 | -0.69 | 0.49                       |          | 0.66                       | -0.0022 | -0.04 | 0.97                        |          | 0.98                       |
| PC4               | 0.0002          | 0.05  | 0.96                        |          | 0.98                        | -0.0039       | -0.59 | 0.56                        |          | 0.71                        | -0.0007 | -0.10 | 0.92                       |          | 0.97                       | 0.0002  | 0.05  | 0.96                        |          | 0.98                       |
| PC5               | -0.0038         | -0.84 | 0.40                        |          | 0.59                        | 0.0011        | 0.66  | 0.51                        |          | 0.68                        | -0.0015 | -0.80 | 0.42                       |          | 0.61                       | -0.0019 | -0.63 | 0.53                        |          | 0.69                       |
| PC6               | -0.0020         | -0.43 | 0.66                        |          | 0.80                        | 0.0086        | 2.14  | <b>0.03</b>                 |          | 0.10                        | 0.0026  | 0.78  | 0.44                       |          | 0.62                       | 0.0010  | 0.26  | 0.80                        |          | 0.88                       |
| DL-cholesterol    |                 |       |                             |          |                             | Normal-weight |       |                             |          |                             |         | Obese |                            |          |                            |         |       |                             |          |                            |
| PC1               | All individuals |       |                             |          |                             | β             | t     | P value                     | Adjusted | P                           | β       | t     | P value                    | Adjusted | P                          | β       | t     | P value                     | Adjusted | P                          |
|                   | β               | t     | P value                     | Adjusted | P                           |               |       |                             |          |                             |         |       |                            |          |                            |         |       |                             |          |                            |
| PC1               | -0.0004         | -0.33 | 0.74                        |          | 0.85                        | 0.0011        | 0.66  | 0.51                        |          | 0.68                        | -0.0015 | -0.80 | 0.42                       |          | 0.61                       | -0.0019 | -0.63 | 0.53                        |          | 0.69                       |
| PC2               | -0.0042         | -1.96 | <b>0.05</b>                 |          | 0.14                        | 0.0086        | 2.14  | <b>0.03</b>                 |          | 0.10                        | 0.0026  | 0.78  | 0.44                       |          | 0.62                       | 0.0010  | 0.26  | 0.80                        |          | 0.88                       |
| PC3               | 0.0038          | 1.48  | 0.14                        |          | 0.29                        | -0.0086       | -1.85 | 0.06                        |          | 0.17                        | 0.0022  | 0.37  | 0.71                       |          | 0.83                       | -0.0086 | -1.85 | 0.06                        |          | 0.17                       |
| PC4               | 0.0040          | 1.45  | 0.15                        |          | 0.30                        | 0.0003        | 0.05  | 0.96                        |          | 0.98                        | 0.0106  | 2.09  | <b>0.04</b>                |          | 0.11                       | 0.0010  | 0.26  | 0.80                        |          | 0.88                       |
| PC5               | -0.0024         | -0.67 | 0.50                        |          | 0.67                        | 0.0003        | 0.05  | 0.96                        |          | 0.98                        | 0.0106  | 2.09  | <b>0.04</b>                |          | 0.11                       | -0.0086 | -1.85 | 0.06                        |          | 0.17                       |
| PC6               | 0.0064          | 1.74  | 0.08                        |          | 0.20                        | 0.0003        | 0.05  | 0.96                        |          | 0.98                        | 0.0106  | 2.09  | <b>0.04</b>                |          | 0.11                       | 0.0003  | 0.05  | 0.96                        |          | 0.98                       |
| DL-cholesterol    |                 |       |                             |          |                             | Normal-weight |       |                             |          |                             |         | Obese |                            |          |                            |         |       |                             |          |                            |
| PC1               | All individuals |       |                             |          |                             | β             | t     | P value                     | Adjusted | P                           | β       | t     | P value                    | Adjusted | P                          | β       | t     | P value                     | Adjusted | P                          |
|                   | β               | t     | P value                     | Adjusted | P                           |               |       |                             |          |                             |         |       |                            |          |                            |         |       |                             |          |                            |
| PC1               | 0.0152          | 1.40  | 0.16                        |          | 0.32                        | 0.0145        | 1.04  | 0.30                        |          | 0.49                        | 0.0137  | 0.78  | 0.44                       |          | 0.62                       | 0.0029  | 0.11  | 0.91                        |          | 0.97                       |
| PC2               | 0.0026          | 0.13  | 0.89                        |          | 0.95                        | 0.0029        | 0.11  | 0.91                        |          | 0.97                        | -0.0008 | -0.03 | 0.98                       |          | 0.98                       | 0.0936  | 2.74  | <b>0.006</b>                |          | <b>0.029</b>               |
| PC3               | 0.0395          | 1.79  | 0.07                        |          | 0.18                        | 0.0936        | 2.74  | <b>0.006</b>                |          | <b>0.029</b>                | 0.0084  | 0.29  | 0.77                       |          | 0.87                       | -0.0612 | -1.84 | 0.07                        |          | 0.17                       |
| PC4               | -0.0456         | -1.91 | 0.06                        |          | 0.15                        | -0.0612       | -1.84 | 0.07                        |          | 0.17                        | -0.0237 | -0.68 | 0.50                       |          | 0.67                       | 0.0394  | 0.99  | 0.32                        |          | 0.51                       |
| PC5               | 0.0316          | 1.01  | 0.31                        |          | 0.51                        | 0.0394        | 0.99  | 0.32                        |          | 0.51                        | 0.0249  | 0.45  | 0.65                       |          | 0.79                       | -0.0125 | -0.28 | 0.78                        |          | 0.87                       |
| PC6               | -0.0152         | -0.47 | 0.64                        |          | 0.78                        | -0.0125       | -0.28 | 0.78                        |          | 0.87                        | -0.0203 | -0.44 | 0.66                       |          | 0.80                       | -0.0125 | -0.28 | 0.78                        |          | 0.87                       |
| Apo B             |                 |       |                             |          |                             | Normal-weight |       |                             |          |                             |         | Obese |                            |          |                            |         |       |                             |          |                            |
| PC1               | All individuals |       |                             |          |                             | β             | t     | P value                     | Adjusted | P                           | β       | t     | P value                    | Adjusted | P                          | β       | t     | P value                     | Adjusted | P                          |
|                   | β               | t     | P value                     | Adjusted | P                           |               |       |                             |          |                             |         |       |                            |          |                            |         |       |                             |          |                            |
| PC1               | -0.0037         | -1.67 | 0.10                        |          | 0.22                        | -0.0098       | -2.74 | <b>0.006</b>                |          | <b>0.029</b>                | -0.0008 | -0.27 | 0.79                       |          | 0.88                       | 0.0085  | 1.33  | 0.18                        |          | 0.36                       |
| PC2               | 0.0042          | 1.06  | 0.29                        |          | 0.49                        | 0.0085        | 1.33  | 0.18                        |          | 0.36                        | 0.0004  | 0.07  | 0.94                       |          | 0.97                       | 0.0126  | 1.58  | 0.11                        |          | 0.25                       |
| PC3               | 0.0041          | 0.92  | 0.36                        |          | 0.55                        | 0.0126        | 1.58  | 0.11                        |          | 0.25                        | -0.0002 | -0.04 | 0.97                       |          | 0.98                       | 0.0036  | 0.41  | 0.68                        |          | 0.81                       |
| PC4               | 0.0001          | 0.02  | 0.99                        |          | 0.99                        | 0.0036        | 0.41  | 0.68                        |          | 0.81                        | -0.0002 | -0.04 | 0.97                       |          | 0.98                       | 0.0111  | 0.95  | 0.34                        |          | 0.53                       |
| PC5               | 0.0088          | 1.14  | 0.25                        |          | 0.44                        | 0.0111        | 0.95  | 0.34                        |          | 0.53                        | 0.0071  | 0.69  | 0.49                       |          | 0.66                       | -0.0085 | -0.76 | 0.44                        |          | 0.62                       |
| PC6               | 0.0006          | 0.08  | 0.93                        |          | 0.97                        | -0.0085       | -0.76 | 0.44                        |          | 0.62                        | 0.0063  | 0.74  | 0.46                       |          | 0.63                       |         |       |                             |          |                            |
| Liver enzymes     |                 |       |                             |          |                             | Normal-weight |       |                             |          |                             |         | Obese |                            |          |                            |         |       |                             |          |                            |
| AST               | All individuals |       |                             |          |                             | β             | t     | P value                     | Adjusted | P                           | β       | t     | P value                    | Adjusted | P                          | β       | t     | P value                     | Adjusted | P                          |
|                   | β               | t     | P value                     | Adjusted | P                           |               |       |                             |          |                             |         |       |                            |          |                            |         |       |                             |          |                            |
| PC1               | -0.0007         | -3.66 | <b>0.0002</b>               |          | <b>0.002</b>                | -0.0004       | -1.79 | 0.07                        |          | 0.18                        | -0.0008 | -2.61 | <b>0.009</b>               |          | <b>0.04</b>                | 0.0013  | 0.85  | 0.40                        |          | 0.59                       |
| PC2               | 0.0007          | 2.12  | <b>0.03</b>                 |          | 0.10                        | 0.0013        | 3.43  | <b>0.0006</b>               |          | <b>0.004</b>                | 0.0002  | 0.39  | 0.70                       |          | 0.82                       | 0.0003  | 0.47  | 0.64                        |          | 0.78                       |
| PC3               | -0.0013         | -3.17 | <b>0.001</b>                |          | <b>0.009</b>                | 0.0003        | 0.47  | 0.64                        |          | 0.78                        | -0.0021 | -3.71 | <b>0.0002</b>              |          | <b>0.002</b>               | -0.0003 | -0.57 | 0.57                        |          | 0.72                       |
| PC4               | -0.0009         | -2.20 | <b>0.03</b>                 |          | 0.09                        | -0.0003       | -0.57 | 0.57                        |          | 0.72                        | -0.0015 | -2.28 | <b>0.02</b>                |          | 0.08                       | 0.0004  | 0.59  | 0.56                        |          | 0.71                       |
| PC5               | 0.0002          | 0.30  | 0.77                        |          | 0.87                        | 0.0004        | 0.59  | 0.56                        |          | 0.71                        | 0.0001  | 0.07  | 0.94                       |          | 0.97                       | -0.0014 | -1.99 | <b>0.047</b>                |          | 0.14                       |
| PC6               | -0.0014         | -2.39 | <b>0.02</b>                 |          | 0.06                        | -0.0014       | -1.99 | <b>0.047</b>                |          | 0.14                        | -0.0012 | -1.32 | 0.19                       |          | 0.37                       |         |       |                             |          |                            |
| ALT               |                 |       |                             |          |                             | Normal-weight |       |                             |          |                             |         | Obese |                            |          |                            |         |       |                             |          |                            |
| PC1               | All individuals |       |                             |          |                             | β             | t     | P value                     | Adjusted | P                           | β       | t     | P value                    | Adjusted | P                          | β       | t     | P value                     | Adjusted | P                          |
|                   | β               | t     | P value                     | Adjusted | P                           |               |       |                             |          |                             |         |       |                            |          |                            |         |       |                             |          |                            |
| PC1               | -0.0005         | -3.30 | <b>0.0009</b>               |          | <b>0.006</b>                | -0.0002       | -1.16 | 0.25                        |          | 0.44                        | -0.0005 | -2.54 | <b>0.01</b>                |          | <b>0.05</b>                | 0.0011  | 3.38  | <b>0.0007</b>               |          | <b>0.005</b>               |
| PC2               | 0.0002          | 0.94  | 0.35                        |          | 0.54                        | 0.0000        | 0.08  | 0.93                        |          | 0.97                        | -0.0004 | -1.08 | 0.28                       |          | 0.48                       | 0.0000  | 0.08  | 0.93                        |          | 0.97                       |
| PC3               | -0.0005         | -1.51 | 0.13                        |          | 0.28                        | 0.0001        | 0.24  | 0.81                        |          | 0.89                        | -0.0006 | -1.53 | 0.13                       |          | 0.28                       | 0.0001  | 0.24  | 0.81                        |          | 0.89                       |
| PC4               | 0.0001          | 0.29  | 0.77                        |          | 0.87                        | 0.0003        | 0.51  | 0.61                        |          | 0.76                        | 0.0001  | 0.14  | 0.89                       |          | 0.95                       | -0.0001 | -0.16 | 0.76                        |          | 0.76                       |
| PC5               | 0.0001          | 0.28  | 0.78                        |          | 0.87                        | -0.0005       | -0.76 | 0.45                        |          | 0.62                        | -0.0001 | -0.16 | 0.87                       |          | 0.93                       | 0.0009  | 1.50  | 0.13                        |          | 0.28                       |
| PC6               | 0.0002          | 0.53  | 0.60                        |          | 0.74                        | 0.0009        | 1.50  | 0.13                        |          | 0.28                        | 0.0009  | 1.50  | 0.13                       |          | 0.28                       |         |       |                             |          |                            |
| GGT               |                 |       |                             |          |                             | Normal-weight |       |                             |          |                             |         | Obese |                            |          |                            |         |       |                             |          |                            |
| PC1               | All individuals |       |                             |          |                             | β             | t     | P value                     | Adjusted | P                           | β       | t     | P value                    | Adjusted | P                          | β       | t     | P value                     | Adjusted | P                          |
|                   | β               | t     | P value                     | Adjusted | P                           |               |       |                             |          |                             |         |       |                            |          |                            |         |       |                             |          |                            |
| PC1               | -0.0009         | -2.67 | <b>0.008</b>                |          | <b>0.03</b>                 | 0.0011        | 2.49  | <b>0.01</b>                 |          | <b>0.05</b>                 | -0.0016 | -3.18 | <b>0.002</b>               |          | <b>0.009</b>               | -0.0005 | -0.70 | 0.48                        |          | 0.66                       |
| PC2               | -0.0003         | -0.50 | 0.61                        |          | 0.76                        | -0.0005       | -0.70 | 0.48                        |          | 0.66                        | -0.0009 | -0.97 | 0.33                       |          | 0.53                       | -0.0021 | -2.14 | <b>0.03</b>                 |          | 0.10                       |
| PC3               | -0.0032         | -4.58 | <b>5.1x10<sup>-6</sup></b>  |          | <b>6.6x10<sup>-5</sup></b>  | 0.0009        | 0.95  | 0.34                        |          | 0.53                        | -0.0039 | -4.17 | <b>3.6x10<sup>-5</sup></b> |          | <b>3.9x10<sup>-4</sup></b> | 0.0003  | 0.28  | 0.78                        |          | 0.87                       |
| PC4               | 0.0001          | 0.19  | 0.85                        |          | 0.92                        | 0.0023        | 2.04  | <b>0.04</b>                 |          | 0.12                        | -0.0005 | -0.29 | 0.77                       |          | 0.87                       | 0.0003  | 0.28  | 0.78                        |          | 0.87                       |
| PC5               | 0.0001          | 0.09  | 0.93                        |          | 0.97                        | 0.0008        | 0.56  | 0.58                        |          | 0.72                        | -0.0007 | -0.46 | 0.65                       |          | 0.79                       | 0.0001  | 0.09  | 0.93                        |          | 0.97                       |
| PC6               | -0.0006         | -0.63 | 0.53                        |          | 0.69                        | 0.0008        | 0.56  | 0.58                        |          | 0.72                        | -0.0007 | -0.46 | 0.65                       |          | 0.79                       |         |       |                             |          |                            |

The beta value is given for the Box-Cox transformed variables. Insulin, CRP, ApoB, glucose, TG, total cholesterol and HOMA-IR were log-transformed. Creatinine and fat mass were square root-transformed. Other variables were transformed according to the following  $\lambda$  factors:  $\lambda=2$  for diastolic blood pressure percentile,  $\lambda=1$  for ALT,  $\lambda=-0.5$  for GGT and AST, and  $\lambda=0.25$  for uric acid and HDL cholesterol. The multivariate model was adjusted by gender, age and BMI percentile. P-values were corrected by Fdr and significant values are shown in bold. Significant P-values are shown in bold.

**Supplemental Table 4. Characteristics of the cross-sectional study of Mexican children.**

|                                     | All subjects (554) |            |       |
|-------------------------------------|--------------------|------------|-------|
|                                     | M/F (278/276)      |            |       |
|                                     |                    | Percentile |       |
|                                     | Median             | 25         | 75    |
| <b>Clinical</b>                     |                    |            |       |
| Age (years)                         | 10.0               | 8.4        | 11.5  |
| Body weight (kg)                    | 36.0               | 27.3       | 45.0  |
| Height (cm)                         | 138.2              | 127.4      | 147.3 |
| BMI (kg/m <sup>2</sup> )            | 19.0               | 16.9       | 21.1  |
| BMI percentile                      | 81.3               | 60.1       | 90.9  |
| BMI z score                         | 0.89               | 0.22       | 1.34  |
| Fat mass (% of BW)                  | 33.8               | 25.1       | 40.4  |
| Lean mass (% of BW)                 | 66.2               | 59.5       | 74.9  |
| Systolic blood pressure percentile  | 38.0               | 21.4       | 58.3  |
| Diastolic blood pressure percentile | 75.5               | 59.7       | 86.0  |
| <b>Biochemical</b>                  |                    |            |       |
| Glucose (mg/dL)                     | 91                 | 86         | 96    |
| Insulin ( $\mu$ U/mL)               | 5.7                | 4          | 8.8   |
| CRP (mg/dL)                         | 0.03               | 0.01       | 0.10  |
| HOMA-IR                             | 1.28               | 0.87       | 1.97  |
| Creatinine (mg/dL)                  | 0.47               | 0.41       | 0.54  |
| Uric acid (mg/dL)                   | 4.7                | 4.1        | 5.6   |
| <b>Lipids</b>                       |                    |            |       |
| Triacylglycerol (mg/dL)             | 86                 | 61         | 121   |
| Total cholesterol (mg/dL)           | 166                | 148        | 187   |
| HDL-cholesterol (mg/dL)             | 49                 | 41         | 57    |
| LDL-cholesterol (mg/dL)             | 98                 | 83         | 113   |
| <b>Liver enzymes</b>                |                    |            |       |
| AST (U/L)                           | 30                 | 26         | 34    |
| ALT (U/L)                           | 19                 | 16         | 24    |
| GGT (UL)                            | 14                 | 12         | 17    |

**Supplemental Table 5. Effect of PC2-Z on metabolic traits in the cross-sectional study of Mexican children.**

|                                     | All subjects (554)<br>M/F (278/276) |        |                            |                            |
|-------------------------------------|-------------------------------------|--------|----------------------------|----------------------------|
|                                     | $\beta$                             | t      | P value                    | Adjusted P                 |
| <b>Clinical</b>                     |                                     |        |                            |                            |
| BMI percentile                      | 0.899                               | 3.089  | <b>0.002</b>               | <b>0.011</b>               |
| Fat mass (% of BW)                  | 0.388                               | 4.089  | <b>5.0x10<sup>-5</sup></b> | <b>0.0006</b>              |
| Systolic blood pressure percentile  | -0.004                              | -0.219 | 0.827                      | 0.879                      |
| Diastolic blood pressure percentile | -1.096                              | -0.049 | 0.961                      | 0.980                      |
| <b>Biochemical</b>                  |                                     |        |                            |                            |
| Glucose (mg/dL)                     | -0.002                              | -2.022 | <b>0.044</b>               | 0.104                      |
| Insulin ( $\mu$ U/mL)               | 0.014                               | 2.698  | <b>0.007</b>               | <b>0.036</b>               |
| CRP (mg/dL)                         | -0.025                              | -2.485 | <b>0.014</b>               | 0.057                      |
| HOMA-IR                             | 0.013                               | 2.334  | <b>0.020</b>               | 0.066                      |
| Creatinine (mg/dL)                  | 0.000                               | -0.634 | 0.526                      | 0.711                      |
| Uric acid (mg/dL)                   | 0.001                               | 1.936  | 0.053                      | 0.116                      |
| <b>Lipids</b>                       |                                     |        |                            |                            |
| Triacylglycerol (mg/dL)             | 0.017                               | 4.324  | <b>1.8x10<sup>-5</sup></b> | <b>0.0003</b>              |
| Total cholesterol (mg/dL)           | 0.002                               | 1.429  | 0.153                      | 0.240                      |
| HDL-cholesterol (mg/dL)             | -0.005                              | -2.589 | <b>0.010</b>               | <b>0.045</b>               |
| LDL-cholesterol (mg/dL)             | 0.013                               | 1.159  | 0.247                      | 0.363                      |
| <b>Liver enzymes</b>                |                                     |        |                            |                            |
| AST (U/L)                           | 0.000                               | -2.313 | <b>0.021</b>               | 0.066                      |
| ALT (U/L)                           | 0.000                               | -2.233 | <b>0.026</b>               | 0.076                      |
| GGT (U/L)                           | -0.001                              | -4.937 | <b>1.1x10<sup>-6</sup></b> | <b>4.9x10<sup>-5</sup></b> |

The beta value is given for the Box-Cox transformed variables. Insulin, ApoB, glucose, TG, total cholesterol, HDL-cholesterol and HOMA-IR were log-transformed. Creatinine, systolic blood pressure percentile and LDL-cholesterol were square root-transformed. Other variables were transformed according to the following  $\lambda$  factors:  $\lambda=2$  for diastolic blood pressure percentile,  $\lambda=-1$  for ALT,  $\lambda=-0.9$  for GGT,  $\lambda=-0.5$  for AST,  $\lambda=-0.25$  for CRP and  $\lambda=0.25$  for uric acid. The association of hepatic enzymes and CRP with PC2-Z is positive, however due to the nature of the transformation ( $\lambda=-x$ ) the  $\beta$  appears negative. The multivariate model was adjusted by gender, age and BMI percentile. Significant P-values are shown in bold.

**Supplemental Table 6. Effect of PC2-Z on metabolic traits in the cross-sectional study of Mexican children stratified by weight status.**

| Clinical                            | Underweight<br>(41) |         |            | Normal-weight<br>(285) |                                        |            | Overweight<br>(177) |                                        |            | Obese<br>(51) |              |              |
|-------------------------------------|---------------------|---------|------------|------------------------|----------------------------------------|------------|---------------------|----------------------------------------|------------|---------------|--------------|--------------|
|                                     | $\beta$             | P value | Adjusted P | $\beta$                | P value                                | Adjusted P | $\beta$             | P value                                | Adjusted P | $\beta$       | P value      | Adjusted P   |
| Fat mass (% of BW)                  | 0.026               | 0.146   | 0.431      | 0.022                  | 0.056                                  | 0.270      | 0.018               | 0.142                                  | 0.431      | 0.025         | 0.196        | <b>0.494</b> |
| Systolic blood pressure percentile  | 0.066               | 0.246   | 0.519      | -0.014                 | 0.641                                  | 0.822      | -0.019              | 0.589                                  | 0.813      | -0.073        | 0.227        | 0.519        |
| Diastolic blood pressure percentile | 8.083               | 0.919   | 0.961      | 7.921                  | 0.811                                  | 0.915      | -35.957             | 0.424                                  | 0.740      | 8.408         | 0.917        | 0.961        |
| <b>Biochemical</b>                  |                     |         |            |                        |                                        |            |                     |                                        |            |               |              |              |
| Glucose (mg/dL)                     | -0.001              | 0.706   | 0.842      | -0.001                 | 0.242                                  | 0.519      | -0.002              | 0.165                                  | 0.449      | -0.001        | 0.600        | 0.813        |
| Insulin ( $\mu$ U/mL)               | -0.014              | 0.614   | 0.813      | 0.009                  | 0.263                                  | 0.521      | 0.019               | <b>0.041</b>                           | 0.252      | 0.031         | <b>0.053</b> | 0.270        |
| CRP (mg/dL)                         | -0.038              | 0.571   | 0.813      | 0.001                  | 0.945                                  | 0.972      | -0.054              | <b>0.002</b>                           | 0.064      | -0.021        | 0.622        | 0.813        |
| HOMA-IR                             | -0.016              | 0.604   | 0.813      | 0.006                  | 0.424                                  | 0.740      | 0.018               | <b>0.048</b>                           | 0.270      | 0.030         | 0.063        | 0.285        |
| Creatinine (mg/dL)                  | -0.001              | 0.596   | 0.813      | 0.000                  | 0.804                                  | 0.915      | -0.001              | 0.252                                  | 0.519      | -0.001        | 0.673        | 0.832        |
| Uric acid (mg/dL)                   | 0.001               | 0.751   | 0.881      | 0.001                  | 0.492                                  | 0.780      | 0.002               | 0.137                                  | 0.431      | 0.002         | 0.493        | 0.780        |
| <b>Lipids</b>                       |                     |         |            |                        |                                        |            |                     |                                        |            |               |              |              |
| Triacylglycerol (mg/dL)             | 0.000               | 0.966   | 0.972      | 0.015                  | <b><math>9.9 \times 10^{-3}</math></b> | 0.096      | 0.023               | <b><math>6.7 \times 10^{-3}</math></b> | 0.096      | 0.033         | <b>0.025</b> | 0.168        |
| Total cholesterol (mg/dL)           | 0.004               | 0.493   | 0.780      | 0.000                  | 0.865                                  | 0.949      | 0.005               | 0.144                                  | 0.431      | -0.001        | 0.821        | 0.915        |
| HDL-cholesterol (mg/dL)             | 0.002               | 0.706   | 0.842      | -0.004                 | 0.152                                  | 0.432      | -0.007              | 0.080                                  | 0.334      | -0.015        | <b>0.024</b> | 0.168        |
| LDL-cholesterol (mg/dL)             | 0.026               | 0.444   | 0.755      | 0.001                  | 0.972                                  | 0.972      | 0.032               | 0.176                                  | 0.461      | -0.044        | 0.412        | 0.740        |
| <b>Liver enzymes</b>                |                     |         |            |                        |                                        |            |                     |                                        |            |               |              |              |
| AST (U/L)                           | 0.000               | 0.414   | 0.740      | 0.000                  | 0.661                                  | 0.832      | 0.000               | 0.268                                  | 0.521      | -0.002        | <b>0.008</b> | 0.096        |
| ALT (U/L)                           | 0.000               | 0.911   | 0.961      | 0.000                  | 0.214                                  | 0.519      | 0.000               | 0.518                                  | 0.782      | -0.001        | <b>0.005</b> | 0.096        |
| GGT (U/L)                           | -0.001              | 0.507   | 0.782      | -0.001                 | <b>0.009</b>                           | 0.096      | -0.001              | <b>0.022</b>                           | 0.168      | -0.002        | <b>0.000</b> | <b>0.023</b> |

The beta value is given for the Box-Cox transformed variables. Insulin, ApoB, glucose, TG, total cholesterol, HDL-cholesterol and HOMA-IR were log-transformed. Creatinine, systolic blood pressure percentile and LDL-cholesterol were square root-transformed. Other variables were transformed according to the following  $\lambda$  factors:  $\lambda=2$  for diastolic blood pressure percentile,  $\lambda=-1$  for ALT,  $\lambda=-0.9$  for GGT,  $\lambda=-0.5$  for AST,  $\lambda=-0.25$  for CRP and  $\lambda=0.25$  for uric acid. The association of hepatic enzymes and CRP with PC2-Z is positive, however due to the nature of the transformation ( $\lambda=-x$ ) the  $\beta$  appears negative. The multivariate model was adjusted by gender, age and BMI percentile. Significant P-values are shown in bold.

**Supplemental Table 7. Characteristics of Mexican children in the longitudinal cohort, at baseline and after 2 years.**

|                                     | All subjects T0 (301)<br>M/F (137/164) |            |      | All subjects T1 |            |      | P value                     |
|-------------------------------------|----------------------------------------|------------|------|-----------------|------------|------|-----------------------------|
|                                     | Median                                 | Percentile |      | Median          | Percentile |      |                             |
|                                     |                                        | 25         | 75   |                 | 25         | 75   |                             |
| <b>Clinical</b>                     |                                        |            |      |                 |            |      |                             |
| Age (years)                         | 8.7                                    | 7.3        | 9.8  | 10.7            | 9.3        | 11.9 |                             |
| Body weight (kg)                    | 31                                     | 24         | 39   | 40              | 32         | 49   | <b>8.8x10<sup>-50</sup></b> |
| Height (cm)                         | 131                                    | 123        | 138  | 143             | 135        | 151  | <b>1.4x10<sup>-50</sup></b> |
| BMI (kg/m <sup>2</sup> )            | 17.6                                   | 15.9       | 20.7 | 19.5            | 17.0       | 22.8 | <b>9.1x10<sup>-35</sup></b> |
| BMI percentile                      | 77.8                                   | 47.2       | 95.0 | 80.6            | 47.9       | 94.5 | 0.632                       |
| BMI z score                         | 0.76                                   | -0.09      | 1.61 | 0.87            | -0.05      | 1.59 | 0.789                       |
| Fat mass (% of BW)                  | 31.0                                   | 24.4       | 38.2 | 35.6            | 26.6       | 41.6 | <b>4.6x10<sup>-18</sup></b> |
| Lean mass (% of BW)                 | 69.0                                   | 61.8       | 75.7 | 64.4            | 58.4       | 73.4 | <b>1.7x10<sup>-18</sup></b> |
| Systolic blood pressure percentile  | 56                                     | 31         | 81   | 34              | 15         | 62   | <b>1.3x10<sup>-11</sup></b> |
| Diastolic blood pressure percentile | 64                                     | 45         | 82   | 63              | 43         | 85   | 0.846                       |
| <b>Biochemical</b>                  |                                        |            |      |                 |            |      |                             |
| Glucose (mg/dL)                     | 90                                     | 85         | 95   | 89              | 84         | 95   | <b>0.046</b>                |
| Insulin (μ U/mL)                    | 5.0                                    | 3.0        | 7.8  | 6.4             | 4.2        | 10.0 | <b>1.9x10<sup>-10</sup></b> |
| CRP (mg/dL)                         | 0.06                                   | 0.03       | 0.17 | 0.06            | 0.02       | 0.19 | 0.562                       |
| HOMA-IR                             | 1.12                                   | 0.64       | 1.73 | 1.42            | 0.86       | 2.32 | <b>4.0x10<sup>-9</sup></b>  |
| Creatinine (mg/dL)                  | 0.80                                   | 0.40       | 1.00 | 0.48            | 0.43       | 0.54 | <b>8.4x10<sup>-13</sup></b> |
| Uric acid (mg/dL)                   | 5.0                                    | 4.0        | 5.5  | 5.1             | 4.3        | 5.9  | <b>1.5x10<sup>-11</sup></b> |
| <b>Lipids</b>                       |                                        |            |      |                 |            |      |                             |
| Triacylglycerol (mg/dL)             | 92                                     | 59         | 131  | 94              | 61         | 133  | 0.543                       |
| Total cholesterol (mg/dL)           | 175                                    | 155        | 193  | 167             | 149        | 183  | <b>8.2x10<sup>-7</sup></b>  |
| HDL-cholesterol (mg/dL)             | 48                                     | 40         | 57   | 47              | 40         | 56   | <b>0.02</b>                 |
| LDL-cholesterol (mg/dL)             | 104                                    | 87         | 121  | 97              | 83         | 113  | <b>2.5x10<sup>-8</sup></b>  |
| Apo-B                               | 77                                     | 67         | 87   | 77              | 65         | 88   | 0.837                       |
| <b>Liver enzymes</b>                |                                        |            |      |                 |            |      |                             |
| AST (U/L)                           | 29                                     | 26         | 34   | 29              | 24.5       | 33   | <b>0.049</b>                |
| ALT (U/L)                           | 19                                     | 15         | 22   | 20              | 17         | 26.5 | <b>9.5x10<sup>-7</sup></b>  |
| GGT (UL)                            | 13                                     | 11         | 16   | 15              | 12         | 19   | <b>2.5x10<sup>-10</sup></b> |

Significant P-values are shown in bold

**Supplemental Table 8. Effect of baseline PC2-Z on future metabolic traits in Mexican children of the longitudinal cohort.**

|                                     | All subjects T0 (301)<br>M/F (137/164) |        |                            | Adjusted <i>P</i>          |
|-------------------------------------|----------------------------------------|--------|----------------------------|----------------------------|
|                                     | $\beta$                                | t      | <i>P</i> value             |                            |
| <b>Clinical</b>                     |                                        |        |                            |                            |
| BMI percentile                      | 2.377                                  | 4.640  | <b>5.3x10<sup>-6</sup></b> | <b>5 x10<sup>-5</sup></b>  |
| Fat mass (% of BW)                  | 0.950                                  | 5.293  | <b>2.4x10<sup>-7</sup></b> | <b>4.5x10<sup>-6</sup></b> |
| Systolic blood pressure percentile  | 0.058                                  | 1.377  | 0.170                      | 0.248                      |
| Diastolic blood pressure percentile | 0.804                                  | 1.888  | 0.060                      | 0.127                      |
| <b>Biochemical</b>                  |                                        |        |                            |                            |
| Glucose (mg/dL)                     | 0.003                                  | 1.709  | 0.089                      | 0.153                      |
| Insulin ( $\mu$ U/mL)               | 0.026                                  | 2.245  | <b>0.026</b>               | 0.081                      |
| CRP (mg/dL)                         | 0.029                                  | 1.183  | 0.238                      | 0.282                      |
| HOMA-IR                             | 0.018                                  | 1.837  | 0.067                      | 0.128                      |
| Creatinine (mg/dL)                  | -0.002                                 | -1.242 | 0.215                      | 0.273                      |
| Uric acid (mg/dL)                   | 0.009                                  | 2.467  | <b>0.014</b>               | 0.054                      |
| <b>Lipids</b>                       |                                        |        |                            |                            |
| Triacylglycerol (mg/dL)             | 0.038                                  | 4.327  | <b>2.1x10<sup>-5</sup></b> | <b>1.3x10<sup>-4</sup></b> |
| Total cholesterol (mg/dL)           | 0.007                                  | 2.144  | 0.033                      | 0.089                      |
| HDL-cholesterol (mg/dL)             | -0.006                                 | -1.402 | 0.162                      | 0.248                      |
| LDL-cholesterol (mg/dL)             | 0.150                                  | 0.316  | 0.752                      | 0.752                      |
| Apo-B                               | 0.000                                  | -1.264 | 0.207                      | 0.273                      |
| <b>Liver enzymes</b>                |                                        |        |                            |                            |
| AST (U/L)                           | 0.008                                  | 1.987  | <b>0.048</b>               | 0.114                      |
| ALT (U/L)                           | -0.001                                 | -1.100 | 0.272                      | 0.287                      |
| GGT (U/L)                           | -0.001                                 | -1.143 | 0.254                      | 0.284                      |

The beta value is given for the Box-Cox transformed variables. CRP, insulin, glucose, TG, uric acid, TG, total cholesterol, HDL-cholesterol and AST were log-transformed. HOMA-IR and systolic blood pressure percentile were square root-transformed. Other variables were transformed according to the following  $\lambda$  factors:  $\lambda=-0.5$  for ApoB, ALT and GGT. The remainder variables were normally distributed. The multivariate model was adjusted by gender, age and BMI percentile. Significant *P*-values are shown in bold.

**Supplemental Table 9. Associations between baseline amino acids levels and hypertriglyceridemia**

| Amino acid         | OR    | 95 % Confidence interval |          | P value       |
|--------------------|-------|--------------------------|----------|---------------|
|                    |       | Lower CI                 | Upper CI |               |
| Arginine           | 1.73  | 0.97                     | 3.14     | 0.0650        |
| Leucine/Isoleucine | 1.86  | 1.05                     | 3.3      | <b>0.0300</b> |
| Phenylalanine      | 2.12  | 1.21                     | 3.81     | <b>0.0094</b> |
| Tyrosine           | 1.37  | 0.82                     | 2.31     | 0.2281        |
| Valine             | 1.61  | 0.94                     | 2.77     | 0.0778        |
| Proline            | 0.976 | 0.59                     | 1.62     | 0.9272        |

Regression adjusted for age, sex, sampling calendar year, baseline BMI percentile, HOMA and serum TG
